# Supplementary material
Source: PubMed Central journal article supplement (PMC2814840)
Supplement: NIHMS107504-supplement-Supplementarydata.pdf [file NIHMS107504-supplement-Supplementarydata.pdf]

## Review

*Nature Reviews Microbiology* 6, 132-142 (February 2008) |

doi:10.1038/nrmicro1824

### Complement evasion by human pathogens

John D. Lambris<sup>1</sup>(#a1), Daniel Ricklin<sup>1</sup>(#a1) & Brian V. Geisbrecht<sup>2</sup>(#a2)

#### Summary

The human complement system has a pivotal role in the recognition, opsonization and elimination of microbial intruders. This functionality is maintained by a well-balanced interaction network of serum proteins and cell-surface receptors.

Over thousands of years of co-evolution, many microorganisms have developed specific complement-evasion strategies to escape the attack of the immune system. Although some of these strategies are highly specific for a single species, others are shared more broadly among bacteria, viruses, fungi and parasites.

The most prevalent complement-evasion mechanism seems to be the capture of soluble host complement regulators on the microbial surface or the expression of their structural mimics. However, the inactivation of complement components by proteolytic degradation or specific inhibition of essential functional sites is also frequently observed.

*Staphylococcus aureus* has a particularly wide and diverse arsenal of complement-evasion proteins, many of which have been discovered only recently. These numerous evasion strategies could contribute to the high virulence of this bacterium.

Structural biology is an indispensable tool for characterizing the structure and function of complement-evasion proteins. Recent publications of the co-crystal structures of evasion proteins with their human targets have allowed an even deeper insight into the molecular basis of these escape mechanisms.

The rapid increase in the structural and functional understanding of complement evasion could serve as an important starting point for the development of antimicrobial or complement-targeting therapeutics.

## About the authors

### **JOHN D. LAMBRIS**

John D. Lambris is the Dr Ralph and Sallie Weaver Professor of Research Medicine at the department of Pathology and Laboratory Medicine of the University of Pennsylvania, Philadelphia, USA. After earning his Ph.D. in biochemistry from the University of Patras, Greece, he dedicated his research to various aspects of the complement system. In his laboratory at the University of Pennsylvania, he applies ideas and methods that are embodied in engineering, computer science, physics, chemistry and other fields to address today's challenges in complement research. His current research efforts include the development of small-size complement inhibitors, the crosstalk of complement with other pathways and complement evasion by bacteria and viruses. He has been the president of the International Complement Society and is the founder and executive director of the Aegean Conferences.

### **DANIEL RICKLIN**

Daniel Ricklin is a postdoctoral researcher at the University of Pennsylvania, Philadelphia, USA, in the research group of John D. Lambris. He earned his M.Sc. in pharmaceutical sciences from the Swiss Federal Institute of Technology in Zurich, Switzerland, and his Ph.D. in pharmaceutical chemistry from the University of Basel, Switzerland. His current research is centred on the structure, function and interaction network of complement proteins and the therapeutic intervention of complement-related diseases.

### **BRIAN V. GEISBRECHT**

Brian V. Geisbrecht is an assistant professor of cell biology and biophysics at the University of Missouri–Kansas City (UMKC), Missouri, USA. He earned a Ph.D. in biological chemistry from The Johns Hopkins University School of Medicine, Maryland, USA, which was followed by a postdoctoral appointment in biophysics and biophysical chemistry at the same institution. Since joining UMKC in 2004, his laboratory has focused on understanding the molecular basis of host–pathogen interactions in infectious diseases by using various complementary approaches from structural biology (X-ray crystallography, nuclear magnetic resonance and X-ray scattering), biophysics and biochemistry.

---

**Supplementary information S1 (table): Microbial complement-targeting proteins**

| Pathogen Protein                  | Target            | Action                         | Ref    |
|-----------------------------------|-------------------|--------------------------------|--------|
| <b>Bacteria</b>                   |                   |                                |        |
| <b><i>Actinobacillus</i> spp.</b> |                   |                                |        |
| Omp100                            | fh                | Recruitment of regulators      | 1      |
| <b><i>Bordetella</i> spp.</b>     |                   |                                |        |
| FHA                               | C4BP, (fh, FHL-1) | Recruitment of regulators      | 2      |
| <b><i>Borrelia</i> spp.</b>       |                   |                                |        |
| CRASP                             | fh, FHL-1         | Recruitment of regulators      | 3      |
| Erp                               | fh                | Recruitment of regulators      | 4, 5   |
| n/a                               | C8, C9            | Prevents MAC formation         | 6      |
| <b><i>Escherichia</i> spp.</b>    |                   |                                |        |
| OmpA                              | C4BP              | Recruitment of regulators      | 7      |
| StcE                              | C1-INH            | Recruitment of C1-INH          | 8      |
| TraT                              | C5b6              | Prevents MAC formation         | 9      |
| <b><i>Fusobacterium</i> spp.</b>  |                   |                                |        |
| n/a                               | fh                | Recruitment of regulators      | 10     |
| <b><i>Haemophilus</i> spp.</b>    |                   |                                |        |
| n/a                               | C4BP, fh          | Recruitment of regulators      | 11, 12 |
| <b><i>Moraxella</i> spp.</b>      |                   |                                |        |
| UspA1/2                           | C4BP              | Recruitment of regulators      | 13     |
| <b><i>Neisseria</i> spp.</b>      |                   |                                |        |
| LOS                               | fh, FHL-1         | Recruitment of regulators      | 14     |
| GNA1870                           | fh, FHL-1         | Recruitment of regulators      | 15, 16 |
| Por                               | C4BP, fh, FHL-1   | Recruitment of regulators      | 17     |
| n/a                               | MCP               | Attachment to epithelial cells |        |
| <b><i>Porphyromonas</i> spp.</b>  |                   |                                |        |
| prtH                              | C3, IgG           | Degrades C3 and IgG            | 18     |

|                                   |                                                   |                                  |                                                                                              |
|-----------------------------------|---------------------------------------------------|----------------------------------|----------------------------------------------------------------------------------------------|
| <b><i>Pseudomonas</i> spp.</b>    |                                                   |                                  |                                                                                              |
| PaE                               | Pseudomonas elastase                              | C1q, C3                          | Degrades C1q and C3                                                                          |
| PaAP                              | Pseudomonas alkaline protease                     | C1q, C3                          | Degrades C1q and C3                                                                          |
| Tuf                               | Elongation factor                                 | fH, FHL-1                        | Recruitment of regulators                                                                    |
| <b><i>Serratia</i> spp.</b>       |                                                   |                                  |                                                                                              |
| n/a                               | 56 kDa protease                                   | C5a, C1-INH                      | Degrades C5a, degrades C1-INH                                                                |
| <b><i>Staphylococcus</i> spp.</b> |                                                   |                                  |                                                                                              |
| CHIPS                             | Chemotaxis inhibitory protein of <i>S. aureus</i> | C5aR                             | Antagonizes C5a                                                                              |
| Efb                               | Extracellular fibrinogen-binding protein          | C3/C3b/C3d                       | Inhibition of C3 and C3b-containing convertases                                              |
| Ehp <sup>a</sup>                  | Efb-homologous protein                            | C3/C3b/C3d                       | Inhibition of C3 and C3b-containing convertases                                              |
| SAK                               | Staphylokinase                                    | C3b, IgG<br>(via Plasmin)<br>IgG | Cleaves complement proteins,<br>removes C3b from surface<br>Inhibits Ig interaction with C1q |
| Sbi                               | <i>S. aureus</i> IgG-binding protein              | C3 Convertases                   | Inhibits C3 activation to C3a/C3b                                                            |
| SCIN                              | Staphylococcal complement inhibitor               | Ig's, gC1q-R                     | Inhibits Ig interaction with C1q                                                             |
| SpA                               | <i>S. aureus</i> protein A                        | C5                               | Prevents C5 cleavage                                                                         |
| SSL-7                             | Staphylococcal superantigen-like protein 7        |                                  |                                                                                              |
| <b><i>Streptococcus</i> spp.</b>  |                                                   |                                  |                                                                                              |
| Bac                               | -Protein                                          | IgA, fH                          | Recruitment of regulators                                                                    |
| Fba                               | Fibronectin-binding protein                       | fH, FHL-1                        | Recruitment of regulators                                                                    |
| Hic <sup>b</sup>                  | Factor H-binding inhibitor of complement          | fH                               | Recruitment of regulators                                                                    |
| IdeS                              | IgG-degrading Enzyme of <i>S. pyogenes</i>        | IgG                              | Cleaves IgG, no interaction with C1q                                                         |
| M <sup>b</sup>                    | Surface proteins M family (Acp, Sir, etc.)        | fH, C4BP, FHL, FHR, MCP          | Recruitment of regulators                                                                    |
| PLY                               | Pneumolysin                                       | IgG, C1q                         | Complement activation / depletion                                                            |
| PspA                              | Pneumococcal surface protein A                    | unknown                          | Potential impairing of AP and complement receptors                                           |
| PspC <sup>c</sup>                 | Pneumococcal surface protein C                    | fH (C3, IgA)                     | Recruitment of regulators.                                                                   |
| scpA/B                            | Streptococcal C5a peptidase                       | C5a                              | Potential degradation of C3/C3b                                                              |
| SIC                               | Streptococcal inhibitor of complement             | C5b-7, C5b-8                     | Degrades C5a, Disrupts signaling                                                             |
| SPE B                             | Streptococcal pyrogenic exotoxin B                | Properdin, Ig's                  | Prevention of MAC formation                                                                  |
| SpG                               | Streptococcus protein G                           | Ig's                             | Degrades Properdin, Ig's<br>Inhibits Ig interaction with C1q                                 |

|                                     |                                                               |                  |  |                                                                                |        |
|-------------------------------------|---------------------------------------------------------------|------------------|--|--------------------------------------------------------------------------------|--------|
| <b><i>Yersinia</i> spp.</b>         |                                                               |                  |  |                                                                                |        |
| YadA                                | Yersinia adhesin A                                            | fH               |  | Recruitment of regulators                                                      | 52     |
| <b>Viruses</b>                      |                                                               |                  |  |                                                                                |        |
| <b>Herpes viruses</b>               |                                                               |                  |  |                                                                                |        |
| gC1/2                               | Transmembrane glycoproteins C1,C2 (HSV)                       | C3b              |  | Binds to C3b, decay acceleration (only AP), inhibits binding of properdin & C5 | 53     |
| gE+gI                               | Glycoproteins E+I (HSV)                                       | IgG              |  | Fc-receptor, less activation                                                   | 54, 55 |
| gp34,68                             | Glycoproteins 34, 68 (HCMV)                                   | IgG              |  | Fc-receptors, less activation                                                  | 56, 57 |
| gpl+gpIV                            | Glycoproteins I+IV (VZV)                                      | IgG              |  | Fc-receptor, less activation                                                   | 58     |
| KCP <sup>d</sup>                    | Kaposi's sarkoma-associated complement control protein (KSHV) | C3b              |  | Mimics regulators (cofactor/decay acceleration)                                | 59     |
| <b>Retroviruses</b>                 |                                                               |                  |  |                                                                                |        |
| gp41                                | Envelope glycoprotein 41 (HIV)                                | C1q, fH, CD59    |  | Direct CP activation, Recruitment of regulators, decrease CD59 expression      | 60-62  |
| gp120                               | Envelope glycoprotein 120 (HIV)                               | MBL, fH          |  | Direct LP activation, Recruitment of regulators                                | 62, 63 |
| Tat                                 | Transactivator of transcription (HIV)                         | C1-INH           |  | Induces C1-INH expression                                                      | 64     |
| <b>Poxviruses</b>                   |                                                               |                  |  |                                                                                |        |
| IMP                                 | Cowpox control inflammation modulatory protein (Cowpox Virus) | C3b, Convertases |  | Mimics regulators (cofactor/decay acceleration)                                | 65     |
| MOPICE                              | Monkeypox inhibitor of complement enzymes (monkeypox virus)   | C3b              |  | Mimics regulators (only cofactor activity)                                     | 66     |
| SPICE                               | Smallpox inhibitor of complement enzymes (variola virus)      | C3b, Convertases |  | Mimics regulators (cofactor/decay acceleration)                                | 67     |
| VCP                                 | Vaccinia virus complement control protein (vaccinia virus)    | C3b, Convertases |  | Mimics regulators (cofactor/decay acceleration)                                | 68     |
| <b>Filoviruses</b>                  |                                                               |                  |  |                                                                                |        |
| NS1                                 | Non-structural protein 1 (West Nile virus)                    | fH               |  | Recruitment of regulators                                                      | 69     |
| <b>Fungi</b>                        |                                                               |                  |  |                                                                                |        |
| <b><i>Aspergillus fumigatus</i></b> |                                                               |                  |  |                                                                                |        |
| n/a                                 | Unknown factor                                                | fH, FHL-1, C4BP  |  | RCA recruitment                                                                | 83     |

|                                |                                                  |                 |                           |        |
|--------------------------------|--------------------------------------------------|-----------------|---------------------------|--------|
| <b><i>Candida albicans</i></b> |                                                  |                 |                           |        |
| CRASP-1                        | Complement regulator-acquiring surface protein 1 | fH, FHL-1, C4BP | Recruitment of regulators | 84, 85 |
| Gpm1p                          | Phosphoglycerate mutase                          | fH, FHL-1       | Recruitment of regulators | 86     |

**Parasites**

|                                 |                                                  |                  |                                                           |        |
|---------------------------------|--------------------------------------------------|------------------|-----------------------------------------------------------|--------|
| <b><i>Echinococcus</i> spp.</b> |                                                  |                  |                                                           |        |
| n/a                             | Hydatid cyst wall                                | fH               | Recruitment of regulators                                 | 70     |
| <b><i>Ixodes</i> spp.</b>       |                                                  |                  |                                                           |        |
| IRAC                            | <i>Ixodes ricinus</i> anti-complement protein    | AP convertase    | Decay acceleration                                        | 71     |
| ISAC                            | <i>Ixodes scapularis</i> anti-complement protein | AP convertase    | Decay acceleration                                        | 72     |
| <b><i>Onchocerca</i> spp.</b>   |                                                  |                  |                                                           |        |
| mf                              | Microfilariae                                    | fH               | Recruitment of regulators                                 | 73     |
| <b><i>Ornithodoros</i> spp.</b> |                                                  |                  |                                                           |        |
| OmCl                            | <i>Ornithodoros moubata</i> complement inhibitor | C5               | Binds to C5 (potentially blocks binding to C5 convertase) | 74     |
| <b><i>Schistosoma</i> spp.</b>  |                                                  |                  |                                                           |        |
| CRIT                            | Complement C2 receptor trispanning               | C2               | Inhibits CP convertase formation                          | 75     |
| m28                             | 28kDa membrane serine protease                   | iC3b             | Cleaves iC3b, restricts CR3 binding                       | 76, 77 |
| Pmy <sup>e</sup>                | Paramyosin                                       | C8, C9, C1q, IgG | Prevents MAC formation<br>Decreases AP activation         | 78-81  |
| <b><i>Trypanosoma</i> spp.</b>  |                                                  |                  |                                                           |        |
| CRIT                            | Complement C2 receptor trispanning               | C2               | Inhibits CP convertase formation                          | 75     |
| T-DAF                           | Trypanosoma decay-accelerating factor            | Convertase       | Destabilizes convertase                                   | 82     |

<sup>a</sup>Ehp has also been termed extracellular complement-binding protein (Ecb). <sup>b</sup>As Hic is not a member of the classical PspC family but a PspC-like protein, it is listed as separate protein. <sup>c</sup>Former names: cholin-binding protein (CbpA), *Streptococcus pneumoniae* secretory IgA-binding protein (SpsA) and pneumococcal C3-binding protein A (PbcA). <sup>d</sup>KPC has also been termed kaposica. <sup>e</sup>Paramyosin has previously been described as Schistosome complement inhibitor protein 1 (SCIP-1). AP, alternative pathway; C1-INH, C1 esterase inhibitor; C4BP, C4-binding protein; C5aR, C5a receptor; CP, classical pathway; DAF, decay accelerating factor; fH, factor H; FHL, factor H-like protein; Ig, immunoglobulin; MBL, mannose-binding lectin; MCP, membrane cofactor protein.

**Supplementary information S1 (table): References**

1. Asakawa, R. *et al.* Outer membrane protein 100, a versatile virulence factor of *Actinobacillus actinomycetemcomitans*. *Mol. Microbiol.* **50**, 1125-1139 (2003).
2. Berggard, K., Johnsson, E., Mooi, F.R. & Lindahl, G. Bordetella pertussis binds the human complement regulator C4BP: role of filamentous hemagglutinin. *Infect. Immun.* **65**, 3638-3643 (1997).
3. Kraiczy, P., Skerka, C., Kirschfink, M., Brade, V. & Zipfel, P.F. Immune evasion of *Borrelia burgdorferi* by acquisition of human complement regulators FH-1/reconnectin and Factor H. *Eur. J. Immunol.* **31**, 1674-1684 (2001).
4. Hellwage, J. *et al.* The complement regulator factor H binds to the surface protein OspE of *Borrelia burgdorferi*. *J. Biol. Chem.* **276**, 8427-8435 (2001).
5. Stevenson, B., El-Hage, N., Hines, M.A., Miller, J.C. & Babb, K. Differential binding of host complement inhibitor factor H by *Borrelia burgdorferi* Erp surface proteins: a possible mechanism underlying the expansive host range of Lyme disease spirochetes. *Infect. Immun.* **70**, 491-497 (2002).
6. Pausa, M. *et al.* Serum-resistant strains of *Borrelia burgdorferi* evade complement-mediated killing by expressing a CD59-like complement inhibitory molecule. *J. Immunol.* **170**, 3214-3222 (2003).
7. Prasadarao, N.V., Blom, A.M., Villoutreix, B.O. & Linsangan, L.C. A novel interaction of outer membrane protein A with C4b binding protein mediates serum resistance of *Escherichia coli* K1. *J. Immunol.* **169**, 6352-6360 (2002).
8. Latham, W.W., Bergsbaken, T. & Welch, R.A. Potentiation of C1 esterase inhibitor by StcE, a metalloprotease secreted by *Escherichia coli* O157:H7. *The Journal of experimental medicine* **199**, 1077-1087 (2004).
9. Pramoonjago, P. *et al.* Role of TraT protein, an anticomplementary protein produced in *Escherichia coli* by R100 factor, in serum resistance. *J. Immunol.* **148**, 827-836 (1992).
10. Friberg, N., Carlson, P., Meri, S. & Jarva, H. *Fusobacterium necrophorum*, the cause of Lemierre's syndrome, binds factor H. *Mol. Immunol.* **44**, 3976 (2007).
11. Hallstrom, T., Jarva, H., Riesbeck, K. & Blom, A.M. Interaction with C4b-binding protein contributes to nontypeable *Haemophilus influenzae* serum resistance. *J. Immunol.* **178**, 6359-6366 (2007).
12. Hallstrom, T., Zipfel, P.F., Blom, A.M., Forsgren, A. & Riesbeck, K. *Haemophilus influenzae* interacts with the human complement inhibitor factor H. *Molecular Immunology* **44**, 3926 (2007).
13. Nordstrom, T., Blom, A.M., Forsgren, A. & Riesbeck, K. The emerging pathogen *Moraxella catarrhalis* interacts with complement inhibitor C4b binding protein through ubiquitous surface proteins A1 and A2. *J. Immunol.* **173**, 4598-4606 (2004).
14. Madico, G. *et al.* The meningococcal vaccine candidate GNA1870 binds the complement regulatory protein factor H and enhances serum resistance. *J. Immunol.* **177**, 501-510 (2006).
15. Ram, S. *et al.* Binding of C4b-binding protein to porin: a molecular mechanism of serum resistance of *Neisseria gonorrhoeae*. *The Journal of experimental medicine* **193**, 281-295 (2001).
16. Ram, S. *et al.* The contrasting mechanisms of serum resistance of *Neisseria gonorrhoeae* and group B *Neisseria meningitidis*. *Mol. Immunol.* **36**, 915-928 (1999).
17. Kallstrom, H., Liszewski, M.K., Atkinson, J.P. & Jonsson, A.B. Membrane cofactor protein (MCP or CD46) is a cellular pilus receptor for pathogenic *Neisseria*. *Mol. Microbiol.* **25**, 639-647 (1997).
18. Schenkein, H.A., Fletcher, H.M., Bodnar, M. & Macrina, F.L. Increased opsonization of a prfH-defective mutant of *Porphyromonas gingivalis* W83 is caused by reduced degradation of complement-derived opsonins. *J. Immunol.* **154**, 5331-5337 (1995).
19. Hong, Y.Q. & Ghebrehiwet, B. Effect of *Pseudomonas aeruginosa* elastase and alkaline protease on serum complement and isolated components C1q and C3. *Clin. Immunol. Immunopathol.* **62**, 133-138 (1992).
20. Kunert, A. *et al.* Immune Evasion of the Human Pathogen *Pseudomonas aeruginosa*: Elongation Factor Tuf Is a Factor H and Plasminogen Binding Protein. *J. Immunol.* **179**, 2979-2988 (2007).
21. Oda, T. *et al.* Inactivation of chemotactic activity of C5a by the serratal 56-kilodalton protease. *Infect. Immun.* **58**, 1269-1272 (1990).
22. Molla, A., Akaike, T. & Maeda, H. Inactivation of various proteinase inhibitors and the complement system in human plasma by the 56-kilodalton proteinase from *Serratia marcescens*. *Infect. Immun.* **57**, 1868-1871 (1989).

23. de Haas, C.J. *et al.* Chemotaxis inhibitory protein of *Staphylococcus aureus*, a bacterial antiinflammatory agent. *The Journal of experimental medicine* **199**, 687-695 (2004).
24. Hammel, M. *et al.* A structural basis for complement inhibition by *Staphylococcus aureus*. *Nat. Immunol.* **8**, 430-437 (2007).
25. Lee, L.Y. *et al.* Inhibition of complement activation by a secreted *Staphylococcus aureus* protein. *J. Infect. Dis.* **190**, 571-579 (2004).
26. Jongerijs, I. *et al.* *Staphylococcal* complement evasion by various convertase-blocking molecules. *The Journal of experimental medicine* **204**, 2461-2471 (2007).
27. Hammel, M. *et al.* Characterization of Ehp: A secreted complement inhibitory protein from *Staphylococcus aureus*. *J. Biol. Chem.* (2007).
28. Rooijackers, S.H., van Wamel, W.J., Ruyken, M., van Kessel, K.P. & van Strijp, J.A. Antiposonic properties of staphylokinase. *Microbes Infect.* **7**, 476-484 (2005).
29. Zhang, L., Jacobsson, K., Vasi, J., Lindberg, M. & Frykberg, L. A second IgG-binding protein in *Staphylococcus aureus*. *Microbiology* **144** ( Pt 4), 985-991 (1998).
30. Rooijackers, S.H. *et al.* Immune evasion by a staphylococcal complement inhibitor that acts on C3 convertases. *Nat. Immunol.* **6**, 920-927 (2005).
31. Kronvall, G. & Gewurz, H. Activation and inhibition of IgG mediated complement fixation by staphylococcal protein A. *Clin. Exp. Immunol.* **7**, 211-220 (1970).
32. Langley, R. *et al.* The staphylococcal superantigen-like protein 7 binds IgA and complement C5 and inhibits IgA-Fc alpha RI binding and serum killing of bacteria. *J. Immunol.* **174**, 2926-2933 (2005).
33. Areschoug, T., Stalhammar-Carlensalm, M., Karlsson, I. & Lindahl, G. Streptococcal beta protein has separate binding sites for human factor H and IgA-Fc. *J. Biol. Chem.* **277**, 12642-12648 (2002).
34. Pandinipally, V., Wei, L., Skerka, C., Zipfel, P.F. & Cue, D. Recruitment of complement factor H-like protein 1 promotes intracellular invasion by group A streptococci. *Infect. Immun.* **71**, 7119-7128 (2003).
35. Janulczyk, R., Iannelli, F., Sjöholm, A.G., Pozzi, G. & Björck, L. Hic, a novel surface protein of *Streptococcus pneumoniae* that interferes with complement function. *J. Biol. Chem.* **275**, 37257-37263 (2000).
36. von Pawel-Rammigen, U. & Björck, L. IdeS and SpeB: immunoglobulin-degrading cysteine proteinases of *Streptococcus pyogenes*. *Curr. Opin. Microbiol.* **6**, 50-55 (2003).
37. Jarva, H., Jokiranta, T.S., Würzner, R. & Meri, S. Complement resistance mechanisms of streptococci. *Mol. Immunol.* **40**, 95-107 (2003).
38. Mitchell, T.J., Andrew, P.W., Saunders, F.K., Smith, A.N. & Boulnois, G.J. Complement activation and antibody binding by pneumolysin via a region of the toxin homologous to a human acute-phase protein. *Mol. Microbiol.* **5**, 1883-1888 (1991).
39. Paton, J.C., Rowan-Kelly, B. & Ferrante, A. Activation of human complement by the pneumococcal toxin pneumolysin. *Infect. Immun.* **43**, 1085-1087 (1984).
40. Ren, B. *et al.* The virulence function of *Streptococcus pneumoniae* surface protein A involves inhibition of complement activation and impairment of complement receptor-mediated protection. *J. Immunol.* **173**, 7506-7512 (2004).
41. Dave, S., Brooks-Walter, A., Pangburn, M.K. & McDaniel, L.S. PspC, a pneumococcal surface protein, binds human factor H. *Infect. Immun.* **69**, 3435-3437 (2001).
42. Kerr, A.R. *et al.* The contribution of PspC to pneumococcal virulence varies between strains and is accomplished by both complement evasion and complement-independent mechanisms. *Infect. Immun.* **74**, 5319-5324 (2006).
43. Angel, C.S., Ruzek, M. & Hostetter, M.K. Degradation of C3 by *Streptococcus pneumoniae*. *J. Infect. Dis.* **170**, 600-608 (1994).
44. Cheng, Q., Finkel, D. & Hostetter, M.K. Novel purification scheme and functions for a C3-binding protein from *Streptococcus pneumoniae*. *Biochemistry* **39**, 5450-5457 (2000).
45. Chmouryguina, I., Suvorov, A., Ferreri, P. & Cleary, P.P. Conservation of the C5a peptidase genes in group A and B streptococci. *Infect. Immun.* **64**, 2387-2390 (1996).
46. Wexler, D.E., Chenoweth, D.E. & Cleary, P.P. Mechanism of action of the group A streptococcal C5a inactivator. *Proc. Natl. Acad. Sci. U.S.A.* **82**, 8144-8148 (1985).
47. Wexler, D.E., Nelson, R.D. & Cleary, P.P. Human neutrophil chemotactic response to group A streptococci: bacteria-mediated interference with complement-derived chemotactic factors. *Infect. Immun.* **39**, 239-246 (1983).
48. Akesson, P., Sjöholm, A.G. & Björck, L. Protein SIC, a novel extracellular protein of *Streptococcus pyogenes* interfering with complement function. *J. Biol. Chem.* **271**, 1081-1088 (1996).
49. Fernie-King, B.A. *et al.* Streptococcal inhibitor of complement (SIC) inhibits the membrane attack complex by preventing uptake of C567 onto cell membranes. *Immunology* **103**, 390-398 (2001).



50. Tsao, N. *et al.* Streptococcal pyrogenic exotoxin B cleaves properdin and inhibits complement-mediated opsonophagocytosis. *Biochem. Biophys. Res. Commun.* **339**, 779-784 (2006).
51. Björk, L. & Kronvall, G. Purification and some properties of streptococcal protein G, a novel IgG-binding reagent. *J. Immunol.* **133**, 969-974 (1984).
52. China, B., Sory, M.P., N'Guyen, B.T., De Bruyere, M. & Cornelis, G.R. Role of the YadA protein in prevention of opsonization of *Yersinia enterocolitica* by C3b molecules. *Infect. Immun.* **61**, 3129-3136 (1993).
53. Kostavasili, I. *et al.* Mechanism of complement inactivation by glycoprotein C of herpes simplex virus. *J. Immunol.* **158**, 1763-1771 (1997).
54. Johnson, D.C. & Feenstra, V. Identification of a novel herpes simplex virus type 1-induced glycoprotein which complexes with gE and binds immunoglobulin. *J. Virol.* **61**, 2208-2216 (1987).
55. Para, M.F., Baucke, R.B. & Spear, P.G. Glycoprotein gE of herpes simplex virus type 1: effects of anti-gE on virion infectivity and on virus-induced fc-binding receptors. *J. Virol.* **41**, 129-136 (1982).
56. Atalay, R. *et al.* Identification and expression of human cytomegalovirus transcription units coding for two distinct Fcγ receptor homologs. *J. Virol.* **76**, 8596-8608 (2002).
57. Lilley, B.N., Ploegh, H.L. & Tirabassi, R.S. Human cytomegalovirus open reading frame TRL11/IRL11 encodes an immunoglobulin G Fc-binding protein. *J. Virol.* **75**, 11218-11221 (2001).
58. Litwin, V., Jackson, W. & Grose, C. Receptor properties of two varicella-zoster virus glycoproteins, gpI and gpIV, homologous to herpes simplex virus gE and gI. *J. Virol.* **66**, 3643-3651 (1992).
59. Spiller, O.B. *et al.* Complement regulation by Kaposi's sarcoma-associated herpesvirus ORF4 protein. *J. Virol.* **77**, 592-599 (2003).
60. Chong, Y.H. & Lee, M.J. Expression of complement inhibitor protein CD59 in human neuronal and glial cell lines treated with HIV-1 gp41 peptides. *J. Neurovirol.* **6**, 51-60 (2000).
61. Ebenbichler, C.F. *et al.* Human immunodeficiency virus type 1 activates the classical pathway of complement by direct C1 binding through specific sites in the transmembrane glycoprotein gp41. *The Journal of experimental medicine* **174**, 1417-1424 (1991).
62. Stoiber, H., Schneider, R., Janatova, J. & Dierich, M.P. Human complement proteins C3b, C4b, factor H and properdin react with specific sites in gp120 and gp41, the envelope proteins of HIV-1. *Immunobiology* **193**, 98-113 (1995).
63. Thielens, N.M., Tachet-Delorme, P. & Arlaud, G.J. Interaction of C1q and mannan-binding lectin with viruses. *Immunobiology* **205**, 563-574 (2002).
64. Izmailova, E. *et al.* HIV-1 Tat reprograms immature dendritic cells to express chemoattractants for activated T cells and macrophages. *Nat. Med.* **9**, 191-197 (2003).
65. Miller, C.G., Shchelkunov, S.N. & Kotwal, G.J. The cowpox virus-encoded homolog of the vaccinia virus complement control protein is an inflammation modulatory protein. *Virology* **229**, 126-133 (1997).
66. Liszewski, M.K. *et al.* Structure and regulatory profile of the monkeypox inhibitor of complement: comparison to homologs in vaccinia and variola and evidence for dimer formation. *J. Immunol.* **176**, 3725-3734 (2006).
67. Rosengard, A.M., Liu, Y., Nie, Z. & Jimenez, R. Variola virus immune evasion design: expression of a highly efficient inhibitor of
- human complement. *Proc. Natl. Acad. Sci. U.S.A.* **99**, 8808-8813 (2002).
68. McKenzie, R., Kotwal, G.J., Moss, B., Hammer, C.H. & Frank, M.M. Regulation of complement activity by vaccinia virus complement-control protein. *J. Infect. Dis.* **166**, 1245-1250 (1992).
69. Chung, K.M. *et al.* West Nile virus nonstructural protein NS1 inhibits complement activation by binding the regulatory protein factor H. *Proc. Natl. Acad. Sci. U.S.A.* **103**, 19111-19116 (2006).
70. Diaz, A., Ferreira, A. & Sim, R.B. Complement evasion by *Echinococcus granulosis*: sequestration of host factor H in the hydatid cyst wall. *J. Immunol.* **158**, 3779-3786 (1997).
71. Daix, V. *et al.* Ixodes ticks belonging to the Ixodes ricinus complex encode a family of anticomplement proteins. *Insect. Mol. Biol.* **16**, 155-166 (2007).
72. Valenzuela, J.G., Charlab, R., Mather, T.N. & Ribeiro, J.M. Purification, cloning, and expression of a novel salivary anticomplement protein from the tick, *Ixodes scapularis*. *J. Biol. Chem.* **275**, 18717-18723 (2000).
73. Meri, T. *et al.* *Onchocerca volvulus* microfilariae avoid complement attack by direct binding of factor H. *J. Infect. Dis.* **185**, 1786-1793 (2002).
74. Nunn, M.A. *et al.* Complement inhibitor of C5 activation from the soft tick *Ornithodoros moubata*. *J. Immunol.* **174**, 2084-2091 (2005).
75. Inai, J.M. & Sim, R.B. A Schistosoma protein, Sh-TOR, is a novel inhibitor of complement which binds human C2. *FEBS Lett.* **470**, 131-134 (2000).
76. Ghendler, Y., Panzade, M., Arnon, R., McKerrow, J.H. & Fishelson, Z. Schistosoma mansoni: evidence for a 28-kDa membrane-anchored protease on schistosomula. *Exp. Parasitol.* **83**, 73-82 (1996).

77. Marikovsky, M., Arnon, R. & Fishelson, Z. Schistosoma mansoni: localization of the 28 kDa secreted protease in cercaria. *Parasite Immunol.* **12**, 389-401 (1990).
78. Deng, J., Gold, D., LoVerde, P. T. & Fishelson, Z. Inhibition of the complement membrane attack complex by Schistosoma mansoni paramyosin. *Infect. Immun.* **71**, 6402-6410 (2003).
79. Laclette, J.P. *et al.* Paramyosin inhibits complement C1. *J. Immunol.* **148**, 124-128 (1992).
80. McIntosh, R.S., Jones, F.M., Dunne, D.W., McKerrow, J.H. & Pleass, R.J. Characterization of immunoglobulin binding by schistosomes. *Parasite Immunol.* **28**, 407-419 (2006).
81. Parizade, M., Arnon, R., Lachmann, P.J. & Fishelson, Z. Functional and antigenic similarities between a 94-kD protein of Schistosoma mansoni (SCIP-1) and human CD59. *The Journal of experimental medicine* **179**, 1625-1636 (1994).
82. Tambourgi, D.V. *et al.* A partial cDNA clone of trypomastigote decay-accelerating factor (T-DAF), a developmentally regulated complement inhibitor of Trypanosoma cruzi, has genetic and functional similarities to the human complement inhibitor DAF. *Infect. Immun.* **61**, 3656-3663 (1993).
83. Vogl, G. *et al.* Immune evasion by acquisition of complement inhibitors: The mould Aspergillus binds both factor H and C4b binding protein. *Mol. Immunol.* (2007).
84. Meri, T. *et al.* The yeast Candida albicans binds complement regulators factor H and FHL-1. *Infect. Immun.* **70**, 5185-5192 (2002).
85. Meri, T. *et al.* The hyphal and yeast forms of Candida albicans bind the complement regulator C4b-binding protein. *Infect. Immun.* **72**, 6633-6641 (2004).
86. Poltermann, S. *et al.* Gpm1p is a factor H, FHL-1 and plasminogen-binding surface protein of Candida albicans. *J. Biol. Chem.* (2007).
